# Supplementary material for: Pharmacokinetic and exploratory exposure–response analysis of pertuzumab in patients with operable HER2-positive early breast cancer in the APHINITY study
Source: Springer Nature journal article supplement (doi:10.1007/s00280-019-03826-1), 2019-04-11

Conditional weighted residual

4  
2  
0  
-2  
-4

100

Population predictions ( $\mu\text{g/mL}$ )

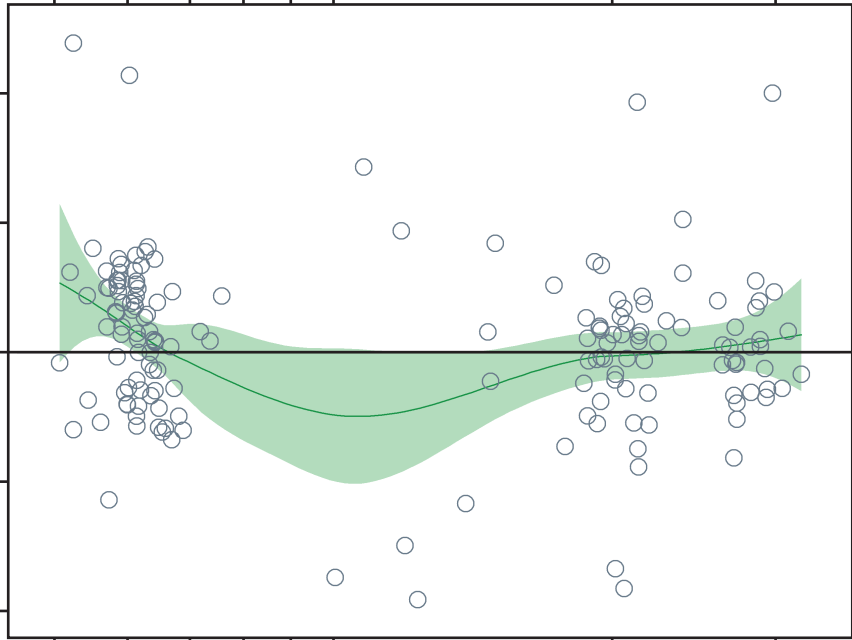

Supplement: MOESM2 [file 16649688]
