# Supplementary material for: Pharmacokinetic and exploratory exposure–response analysis of pertuzumab in patients with operable HER2-positive early breast cancer in the APHINITY study
Source: Springer Nature journal article supplement (doi:10.1007/s00280-019-03826-1), 2019-04-11
Supplement: MOESM4 [file 16649688]

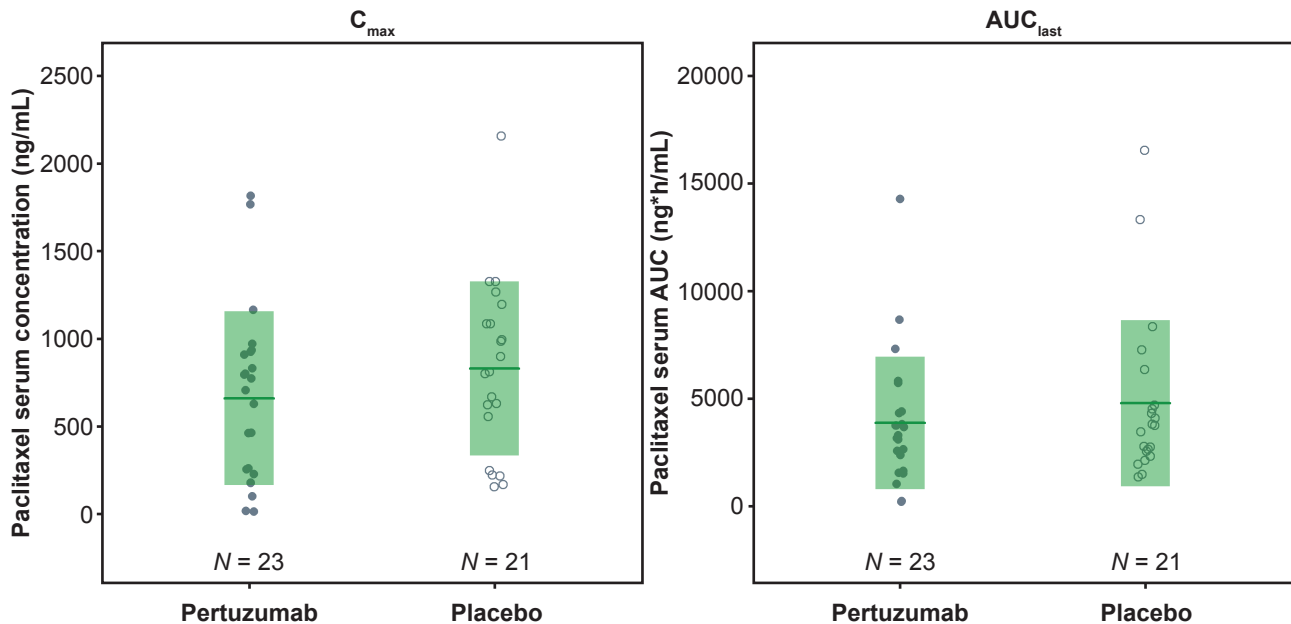

|                           | <b>Pertuzumab +<br/>trastuzumab +<br/>chemotherapy,<br/>mean (± SD)</b> | <b>Placebo +<br/>trastuzumab +<br/>chemotherapy,<br/>mean (± SD)</b> | <b>Geometric<br/>mean ratio<br/>(90% CI)</b> |
|---------------------------|-------------------------------------------------------------------------|----------------------------------------------------------------------|----------------------------------------------|
| <b>n</b>                  | 23                                                                      | 21                                                                   | –                                            |
| <b>C<sub>max</sub></b>    | 665.3 (± 494.8)                                                         | 834.6 (± 495.5)                                                      | 0.639 (0.387–1.06)                           |
| <b>AUC<sub>last</sub></b> | 3901.2 (± 3073.5)                                                       | 4816.7 (± 3859.9)                                                    | 0.731 (0.485–1.1)                            |

Arithmetic means. Serum C<sub>max</sub> in µg/mL. Serum AUC<sub>last</sub> in ng·h/mL.
