# Supplementary material for: Pharmacokinetic and exploratory exposure–response analysis of pertuzumab in patients with operable HER2-positive early breast cancer in the APHINITY study
Source: Springer Nature journal article supplement (doi:10.1007/s00280-019-03826-1), 2019-04-11
Supplement: MOESM5 [file 16649688]

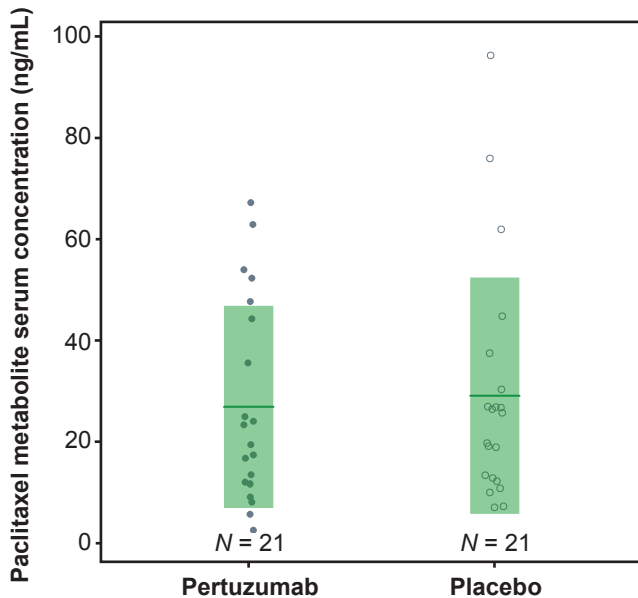

|            | <b>Pertuzumab +<br/>trastuzumab +<br/>chemotherapy,<br/>mean (<math>\pm</math> SD)</b> | <b>Placebo +<br/>trastuzumab +<br/>chemotherapy,<br/>mean (<math>\pm</math> SD)</b> | <b>Geometric<br/>mean ratio<br/>(90% CI)</b> |
|------------|----------------------------------------------------------------------------------------|-------------------------------------------------------------------------------------|----------------------------------------------|
| n          | 21                                                                                     | 21                                                                                  | –                                            |
| $C_{\max}$ | 27.0 ( $\pm$ 19.9)                                                                     | 29.2 ( $\pm$ 23.3)                                                                  | 0.882 (0.587–1.33)                           |

Arithmetic means. Serum  $C_{\max}$  in  $\mu\text{g/mL}$ .
