# Supplementary material for: Pharmacokinetic and exploratory exposure–response analysis of pertuzumab in patients with operable HER2-positive early breast cancer in the APHINITY study
Source: Springer Nature journal article supplement (doi:10.1007/s00280-019-03826-1), 2019-04-11
Supplement: MOESM6 [file 16649688]

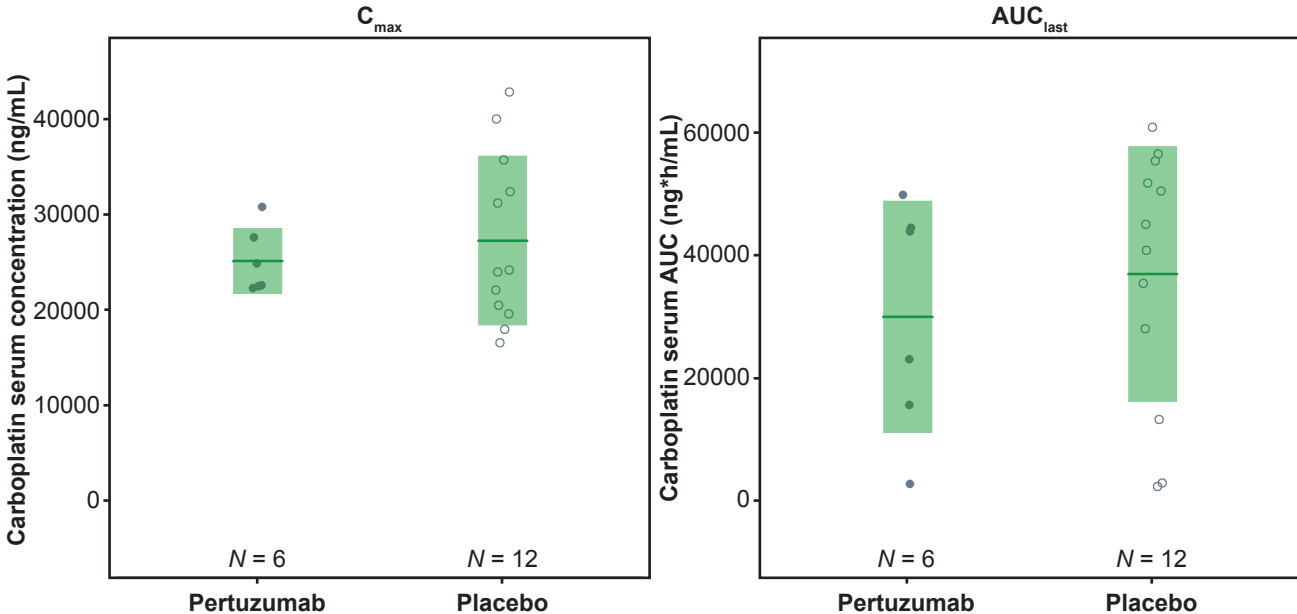

|                           | <b>Pertuzumab +<br/>trastuzumab +<br/>chemotherapy,<br/>mean (± SD)</b> | <b>Placebo +<br/>trastuzumab +<br/>chemotherapy,<br/>mean (± SD)</b> | <b>Geometric<br/>mean ratio<br/>(90% CI)</b> |
|---------------------------|-------------------------------------------------------------------------|----------------------------------------------------------------------|----------------------------------------------|
| <b>n</b>                  | 6                                                                       | 12                                                                   | –                                            |
| <b>C<sub>max</sub></b>    | 25116.7 (± 3453.4)                                                      | 27258.3 (± 8879.7)                                                   | 0.959 (0.795–1.16)                           |
| <b>AUC<sub>last</sub></b> | 29986.2 (± 18914.6)                                                     | 36940.5 (± 20804.7)                                                  | 0.833 (0.307–2.26)                           |

Arithmetic means. Serum C<sub>max</sub> in µg/mL. Serum AUC<sub>last</sub> in ng·h/mL.
